# Supplementary material
Source: publisher figshare collection journal article supplement (https://tandf.figshare.com/articles/dataset/_/19358714)
Supplement: Supplementary file 1 [file 1]

| Gla_Name | RGIId | Area in 1968 (km2) | Length in 1968 (m) | Area in 2020 (km2) | Length in 2020 (m) | Change in length (m) | Rate of retreat (m/yr) | Change in area (km2) | Min_Elevation in 1968 (m) | Min_Elevation in 2020 (m) | Max_Elevation (m) | MEAN SLOPE (°) | Aspect | SDC 2000 (km2) | SDC 2020 (km2) |
| --- | --- | --- | --- | --- | --- | --- | --- | --- | --- | --- | --- | --- | --- | --- | --- |
| G1 | RGI60-15.06654 | 1.1 | 2620.9 | 1.00 | 2241.6 | 379.4 | 7.3 | 0.08 | 4410 | 4580 | 5300 | 20.3 | NE | 0.05 | 0.25 |
| G2 | NA | 3.4 | 4740.1 | 2.22 | 4353.6 | 386.5 | 7.4 | 1.20 | 4000 | 4110 | 5500 | 21.8 | S | 1.00 | 1.11 |
| G3 | RGI60-15.06648 | 3.3 | 4772.7 | 3.15 | 4463.2 | 309.4 | 6.0 | 0.11 | 4210 | 4270 | 5490 | 18.6 | S | 0.41 | 1.01 |
| G4 | RGI60-15.06558 | 30.0 | 12731.4 | 29.63 | 11792.2 | 939.2 | 18.1 | 0.35 | 3800 | 3950 | 5400 | 13.6 | E | 5.03 | 7.19 |
| G5 | RGI60-15.06869 | 1.9 | 2500.9 | 1.86 | 2411.1 | 89.8 | 1.7 | 0.05 | 4550 | 4590 | 5650 | 23.9 | SE | 0.32 | 0.33 |
| G6 | NA | 1.2 | 2064.0 | 1.09 | 1825.6 | 238.5 | 4.6 | 0.15 | 4090 | 4270 | 5100 | 27.5 | N | 0.23 | 0.40 |
| G7 | RGI60-15.06942 | 1.4 | 3146.1 | 1.19 | 2889.2 | 256.9 | 4.9 | 0.26 | 4390 | 4530 | 5900 | 23.9 | N | 0.45 | 0.59 |
| G8/SPG | RGI60-15.07122 | 24.5 | 14047.4 | 20.60 | 13608.7 | 438.7 | 8.4 | 3.90 | 3800 | 3840 | 6200 | 20.5 | NE | 10.93 | 12.90 |
| G9/BKG | RGI60-15.07122 | 30.2 | 20390.1 | 25.69 | 20010.2 | 379.9 | 7.3 | 4.53 | 3750 | 3780 | 6800 | 19.1 | E | 10.76 | 13.12 |
| G10 | NA | 2.0 | 2330.3 | 1.61 | 2053.5 | 276.8 | 5.3 | 0.38 | 4950 | 5080 | 6050 | 26.9 | S | 1.02 | 1.35 |
| G11 | RGI60-15.07190 | 1.3 | 2588.4 | 1.12 | 2567.1 | 21.3 | 0.4 | 0.15 | 4970 | 4990 | 5600 | 16.6 | S | 0.30 | 0.44 |
| G12 | RGI60-15.07197 | 2.2 | 2746.8 | 1.36 | 1975.7 | 771.2 | 14.8 | 0.82 | 5200 | 5370 | 5900 | 20.5 | S | 0.02 | 0.10 |
| G13 | RGI60-15.06896 | 16.2 | 6930.7 | 13.06 | 6406.7 | 524.0 | 10.1 | 3.11 | 4200 | 4260 | 6000 | 21.0 | SE | 0.67 | 1.24 |
| G14 | RGI60-15.06867 | 1.7 | 1907.9 | 1.27 | 1714.1 | 193.8 | 3.7 | 0.43 | 4890 | 5000 | 5600 | 28.5 | NE | 0.03 | 0.18 |
| G15 | RGI60-15.06864 | 2.2 | 2887.5 | 1.99 | 2868.2 | 19.3 | 0.4 | 0.19 | 4780 | 4790 | 5400 | 17.4 | NE | 0.27 | 0.51 |
| G16 | RGI60-15.06861 | 3.5 | 4373.6 | 3.09 | 3963.0 | 410.6 | 7.9 | 0.44 | 4590 | 4880 | 5510 | 20.0 | NE | 1.29 | 2.00 |
| G17 | RGI60-15.06860 | 1.3 | 2878.8 | 1.17 | 2723.1 | 155.7 | 3.0 | 0.12 | 5000 | 5010 | 5900 | 24.4 | NE | 0.16 | 0.29 |
| G18 | RGI60-15.07123 | 23.7 | 10486.0 | 19.59 | 9875.9 | 610.0 | 11.7 | 4.09 | 4710 | 4780 | 5880 | 16.4 | NE | 4.04 | 6.10 |
| G19 | RGI60-15.07164 | 12.5 | 8567.3 | 10.50 | 8255.0 | 312.3 | 6.0 | 1.98 | 4750 | 4780 | 5990 | 15.9 | NE | 1.53 | 2.30 |
| G20 | RGI60-15.07163 | 6.5 | 5446.5 | 6.20 | 4513.1 | 933.4 | 18.0 | 0.31 | 5000 | 5200 | 5900 | 13.3 | SE | 0.15 | 0.71 |
| G21 | RGI60-15.07165 | 14.3 | 8171.9 | 12.33 | 7047.8 | 1124.1 | 21.6 | 1.92 | 5010 | 5090 | 6300 | 12.2 | SE | 0.34 | 1.23 |
| G22 | RGI60-15.06845 | 4.2 | 5061.0 | 3.79 | 4678.0 | 383.0 | 7.4 | 0.45 | 5000 | 5090 | 5800 | 13.6 | SW | 0.39 | 0.81 |
| G23 | RGI60-15.06844 | 3.6 | 5775.8 | 1.47 | 2319.9 | 3455.8 | 66.5 | 2.15 | 4720 | 5200 | 5720 | 15.0 | SE | 0.05 | 0.30 |
| G24 | RGI60-15.06956 | 2.6 | 5285.6 | 1.63 | 3567.9 | 1717.6 | 33.0 | 0.92 | 4710 | 4980 | 5680 | 13.9 | NE | 0.31 | 0.42 |
| G25 | RGI60-15.06957 | 1.1 | 2276.6 | 1.04 | 2136.7 | 139.9 | 2.7 | 0.05 | 5160 | 5190 | 5900 | 18.5 | N | 0.01 | 0.13 |
| G26 | RGI60-15.06843 | 1.2 | 2121.2 | 1.17 | 2061.7 | 59.5 | 1.1 | 0.03 | 5270 | 5280 | 5730 | 15.8 | N | 0.04 | 0.31 |
| G27 | RGI60-15.06854 | 4.0 | 3658.7 | 3.95 | 3176.7 | 482.0 | 9.3 | 0.10 | 5380 | 5450 | 5850 | 12.0 | E | 0.06 | 0.83 |
| G28 | RGI60-15.06856 | 5.1 | 3399.7 | 2.72 | 2442.7 | 957.0 | 18.4 | 2.34 | 5500 | 5570 | 5880 | 13.3 | S | 0.01 | 0.23 |
| G29 | RGI60-15.06851 | 1.6 | 2369.5 | 1.45 | 2088.7 | 280.8 | 5.4 | 0.11 | 5250 | 5290 | 5800 | 15.1 | NE | 0.01 | 0.36 |
| G30 | RGI60-15.06554 | 7.9 | 5229.6 | 5.40 | 4416.4 | 813.2 | 15.6 | 2.45 | 5200 | 5260 | 5900 | 13.2 | NE | 0.31 | 0.81 |
| G31 | NA | 10.0 | 6934.2 | 9.36 | 6687.2 | 247.0 | 4.8 | 0.60 | 4920 | 4940 | 6010 | 14.4 | SE | 1.40 | 2.39 |
| G32 | RGI60-15.06576 | 3.8 | 3039.1 | 3.50 | 2485.0 | 554.1 | 10.7 | 0.26 | 5370 | 5410 | 6100 | 17.4 | NW | 0.03 | 0.37 |
| G33 | RGI60-15.07148 | 18.4 | 10885.4 | 16.78 | 10509.0 | 376.4 | 7.2 | 1.65 | 4990 | 5040 | 6200 | 16.1 | SW | 4.92 | 6.31 |
| G34 | RGI60-15.07112 | 22.2 | 10175.9 | 19.62 | 8606.3 | 1569.6 | 30.2 | 2.57 | 4750 | 4920 | 6800 | 15.3 | SW | 3.33 | 4.20 |
| G35 | RGI60-15.06829 | 1.3 | 2355.1 | 1.09 | 1930.5 | 424.6 | 8.2 | 0.16 | 5380 | 5480 | 5860 | 15.9 | S | 0.02 | 0.16 |
| G36 | RGI60-15.06826 | 21.1 | 14899.4 | 19.27 | 12802.4 | 2097.0 | 40.3 | 1.85 | 4570 | 4800 | 6100 | 15.8 | SW | 7.48 | 8.52 |
| G37 | RGI60-15.07071 | 8.0 | 5908.3 | 6.97 | 3632.4 | 2275.9 | 43.8 | 1.01 | 4590 | 4910 | 6000 | 14.7 | SW | 0.40 | 0.82 |
| G38 | RGI60-15.07072 | 8.8 | 8293.6 | 8.44 | 7398.6 | 895.0 | 17.2 | 0.32 | 4400 | 4490 | 5700 | 14.7 | SW | 2.45 | 3.48 |
| G39 | RGI60-15.07073 | 10.8 | 6702.1 | 10.47 | 5840.2 | 861.9 | 16.6 | 0.37 | 4520 | 4610 | 5380 | 16.8 | W | 1.84 | 3.14 |
| G40 | RGI60-15.07075 | 13.6 | 11667.7 | 13.14 | 10908.2 | 759.5 | 14.6 | 0.50 | 4000 | 4100 | 5700 | 15.7 | SW | 5.64 | 6.43 |
| G41 | RGI60-15.06801 | 1.3 | 1910.4 | 1.13 | 1531.6 | 378.8 | 7.3 | 0.16 | 4400 | 4650 | 5400 | 28.0 | N | 0.02 | 0.07 |
| G42 | RGI60-15.06799 | 1.8 | 2842.7 | 1.57 | 2660.0 | 182.7 | 3.5 | 0.21 | 4700 | 4800 | 5800 | 27.4 | N | 0.05 | 0.17 |
| G43 | NA | 1.1 | 1558.2 | 1.03 | 1367.6 | 190.6 | 3.7 | 0.07 | 4910 | 4980 | 5400 | 23.8 | N | 0.05 | 0.13 |
| G44 | RGI60-15.07204 | 3.0 | 3159.0 | 2.83 | 2750.4 | 408.6 | 7.9 | 0.18 | 4530 | 4800 | 5600 | 19.5 | NW | 0.02 | 0.29 |
| G45/Tipra Bank | RGI60-15.06557 | 11.1 | 7432.3 | 10.24 | 6549.6 | 882.7 | 17.0 | 0.82 | 3740 | 3840 | 4800 | 18.5 | NW | 3.54 | 4.28 |
| G46 | RGI60-15.06791 | 1.7 | 4652.9 | 1.48 | 3687.2 | 965.7 | 18.6 | 0.21 | 3600 | 3900 | 5800 | 26.5 | SW | 0.35 | 0.53 |
| G47 | RGI60-15.06560 | 3.9 | 4370.7 | 3.41 | 2940.0 | 1430.8 | 27.5 | 0.48 | 4050 | 4320 | 4900 | 14.3 | NW | 1.78 | 2.70 |
| G48 | RGI60-15.06789 | 4.5 | 3883.1 | 4.49 | 3690.1 | 193.0 | 3.7 | 0.03 | 4590 | 4630 | 5300 | 15.1 | E | 1.31 | 2.06 |
| G49 | RGI60-15.06559 | 12.0 | 10926.1 | 11.73 | 10057.3 | 868.8 | 16.7 | 0.28 | 3820 | 3950 | 5900 | 15.8 | NE | 3.36 | 4.25 |
| G50 | RGI60-15.06556 | 8.4 | 11601.5 | 8.30 | 11297.3 | 304.3 | 5.9 | 0.09 | 4180 | 4200 | 5500 | 12.7 | SE | 4.69 | 5.80 |
| G51 | RGI60-15.06814 | 2.2 | 2298.1 | 1.94 | 2182.8 | 115.3 | 2.2 | 0.22 | 4810 | 4820 | 5350 | 20.2 | N | 0.19 | 0.47 |
| G52 | RGI60-15.07153 | 43.3 | 20993.6 | 42.92 | 20710.8 | 282.8 | 5.4 | 0.39 | 4000 | 4090 | 6900 | 15.6 | SE | 16.25 | 20.10 |
| G53 | RGI60-15.07169 | 7.1 | 7627.3 | 6.92 | 7200.8 | 426.5 | 8.2 | 0.16 | 4500 | 4800 | 6500 | 15.6 | S | 0.09 | 0.71 |
| G54 | RGI60-15.06816 | 2.4 | 2847.9 | 2.26 | 2750.9 | 97.0 | 1.9 | 0.09 | 5050 | 5090 | 5500 | 13.4 | SE | 0.14 | 0.21 |
| G55 | RGI60-15.07168 | 7.2 | 8590.0 | 6.16 | 6543.7 | 2046.3 | 39.4 | 0.99 | 4550 | 4990 | 6150 | 16.6 | NE | 0.11 | 0.71 |
| G56 | RGI60-15.07151 | 3.0 | 5984.7 | 2.73 | 5375.4 | 609.3 | 11.7 | 0.26 | 4630 | 4750 | 5800 | 13.6 | E | 1.40 | 2.00 |
| G57/Raikana | RGI60-15.06977 | 53.9 | 17517.1 | 52.01 | 15395.8 | 2121.2 | 40.8 | 1.91 | 4480 | 4700 | 6200 | 17.5 | SE | 19.63 | 25.45 |
| G58 | RGI60-15.06819 | 1.7 | 3255.4 | 1.67 | 3181.6 | 73.8 | 1.4 | 0.08 | 5460 | 5490 | 6300 | 19.0 | SE | 0.06 | 0.30 |
| G59 | RGI60-15.06817 | 2.5 | 2525.6 | 2.23 | 2333.6 | 192.0 | 3.7 | 0.25 | 5450 | 5510 | 6100 | 17.8 | SE | 0.04 | 0.60 |
| G60 | RGI60-15.08821 | 3.8 | 5859.3 | 3.56 | 4648.8 | 1210.5 | 23.3 | 0.28 | 5100 | 5250 | 6100 | 18.0 | NE | 0.07 | 0.74 |
| G61 | RGI60-15.08829 | 2.1 | 4502.4 | 1.95 | 3854.5 | 647.9 | 12.5 | 0.11 | 4900 | 4980 | 5800 | 17.3 | E | 0.05 | 0.40 |
| G62 | RGI60-15.08839 | 1.2 | 2325.1 | 1.10 | 2057.9 | 267.1 | 5.1 | 0.11 | 5150 | 5170 | 5900 | 23.6 | NE | 0.00 | 0.24 |
| G63 | RGI60-15.08846 | 1.8 | 1692.8 | 1.80 | 1655.6 | 37.2 | 0.7 | 0.01 | 5100 | 5100 | 5600 | 19.2 | N | 0.01 | 0.39 |
| G64 | RGI60-15.08849 | 2.3 | 1847.6 | 2.25 | 1817.6 | 30.0 | 0.6 | 0.04 | 5100 | 5120 | 5500 | 16.8 | N | 0.04 | 0.31 |
| G65 | RGI60-15.08852 | 3.0 | 3126.0 | 2.96 | 2970.6 | 155.4 | 3.0 | 0.03 | 4600 | 4750 | 6000 | 24.7 | NE | 0.59 | 1.31 |
| G66 | RGI60-15.06701 | 7.6 | 11123.9 | 7.24 | 9137.2 | 1986.7 | 38.2 | 0.39 | 3870 | 4210 | 6000 | 20.0 | N | 3.24 | 4.40 |
| G67 | RGI60-15.06705 | 1.4 | 2735.0 | 1.06 | 1920.0 | 815.1 | 15.7 | 0.39 | 4450 | 4850 | 5400 | 21.6 | NE | 0.22 | 0.28 |
| G68 | RGI60-15.06706 | 1.3 | 2058.3 | 1.02 | 1895.0 | 163.3 | 3.1 | 0.26 | 4980 | 5100 | 6100 | 32.7 | W | 0.00 | 0.22 |
| G69 | RGI60-15.06709 | 5.9 | 4707.3 | 5.83 | 4545.0 | 162.4 | 3.1 | 0.07 | 4870 | 4900 | 6150 | 22.4 | NW | 0.70 | 1.91 |
| G70 | RGI60-15.06711 | 1.6 | 2753.3 | 1.53 | 2622.9 | 130.4 | 2.5 | 0.06 | 5000 | 5090 | 5900 | 26.2 | SW | 0.21 | 0.48 |
| G71 | RGI60-15.07025 | 18.5 | 9126.8 | 18.28 | 8540.2 | 586.6 | 11.3 | 0.20 | 4340 | 4400 | 5900 | 18.1 | NW | 7.52 | 10.06 |
| G72 | RGI60-15.07024 | 2.4 | 1912.2 | 2.38 | 1836.7 | 75.5 | 1.5 | 0.04 | 6400 | 6420 | 7000 | 26.4 | W | 0.00 | 0.00 |
| G73 | RGI60-15.06989 | 1.4 | 2605.4 | 1.27 | 1936.6 | 668.8 | 12.9 | 0.10 | 4930 | 5080 | 5700 | 21.1 | E | 0.03 | 0.15 |
| G74/Dunagiri | RGI60-15.06777 | 2.4 | 5691.4 | 2.40 | 5600.6 | 90.8 | 1.7 | 0.02 | 4230 | 4250 | 5200 | 11.7 | N | 2.12 | 2.19 |
| G75 | RGI60-15.06776 | 3.6 | 6189.6 | 3.64 | 6130.3 | 59.3 | 1.1 | 0.01 | 3830 | 3880 | 5600 | 21.7 | NW | 1.15 | 1.70 |
| G76 | RGI60-15.06774 | 4.2 | 4339.5 | 3.54 | 3593.4 | 746.1 | 14.3 | 0.67 | 5150 | 5250 | 6100 | 14.8 | SE | 1.33 | 1.73 |
| G77/Ramni | RGI60-15.06561 | 9.8 | 9215.3 | 9.49 | 8738.3 | 476.9 | 9.2 | 0.29 | 4670 | 4790 | 5800 | 13.5 | SW | 3.35 | 4.88 |
| G78 | RGI60-15.06762 | 1.9 | 3697.2 | 1.67 | 3330.5 | 366.7 | 7.1 | 0.19 | 5070 | 5180 | 5900 | 16.2 | SW | 0.02 | 0.18 |
| G79/Changbang | RGI60-15.06763 | 5.7 | 6332.5 | 5.51 | 5766.3 | 566.2 | 10.9 | 0.15 | 4790 | 4910 | 6200 | 15.4 | S | 3.71 | 4.43 |
| G80/Uttari Nanda Devi | RGI60-15.06563 | 31.6 | 16529.4 | 31.34 | 15866.6 | 662.8 | 12.7 | 0.27 | 4140 | 4200 | 6800 | 19.6 | SW | 11.22 | 13.38 |
| G81 | RGI60-15.07000 | 2.3 | 3040.1 | 1.92 | 2867.6 | 172.5 | 3.3 | 0.37 | 5150 | 5190 | 5870 | 40.5 | SW | 0.01 | 0.34 |
| G82 | RGI60-15.06999 | 1.7 | 3390.7 | 1.61 | 3219.4 | 171.3 | 3.3 | 0.10 | 5170 | 5200 | 6100 | 26.3 | SW | 0.00 | 0.13 |
| G83 | RGI60-15.07001 | 1.3 | 3450.6 | 1.14 | 3225.0 | 225.6 | 4.3 | 0.13 | 5180 | 5240 | 6600 | 28.9 | SW | 0.04 | 0.49 |
| G84 | RGI60-15.06768 | 1.6 | 3623.6 | 1.09 | 2588.8 | 1034.7 | 19.9 | 0.50 | 5100 | 5280 | 5900 | 17.6 | SW | 0.01 | 0.41 |
| G85 | RGI60-15.07301 | 4.1 | 2853.4 | 3.68 | 2316.6 | 536.8 | 10.3 | 0.42 | 5095 | 5220 | 7000 | 39.5 | S | 0.06 | 0.78 |
| G86/Dakshni Nanda Devi | RGI60-15.06727 | 6.8 | 10011.2 | 6.70 | 9797.9 | 213.3 | 4.1 | 0.06 | 4380 | 4400 | 5550 | 15.0 | NW | 4.09 | 5.09 |
| G87/Dakshni Rishi | RGI60-15.07158 | 19.8 | 12421.5 | 19.48 | 11896.4 | 525.1 | 10.1 | 0.27 | 4500 | 4590 | 6700 | 18.6 | NE | 4.67 | 6.03 |
| G88 | RGI60-15.06730 | 4.7 | 4517.6 | 4.26 | 4292.9 | 224.8 | 4.3 | 0.39 | 4990 | 5080 | 6600 | 24.3 | NE | 0.02 | 0.30 |
| G89 | RGI60-15.07084 | 2.9 | 4211.3 | 2.74 | 3928.1 | 283.2 | 5.4 | 0.12 | 4770 | 4900 | 6300 | 26.1 | NE | 0.05 | 0.42 |
| G90 | RGI60-15.06728 | 4.5 | 4061.2 | 4.23 | 3723.9 | 337.4 | 6.5 | 0.28 | 5000 | 5100 | 6600 | 25.7 | NE | 0.01 | 0.09 |
| G91/Trishul | RGI60-15.07034 | 36.2 | 15352.5 | 35.96 | 14300.9 | 1051.6 | 20.2 | 0.26 | 4320 | 4410 | 6600 | 21.2 | N | 3.66 | 4.98 |
| G92/Bethar toli | RGI60-15.07086 | 13.3 | 8014.0 | 13.06 | 7047.9 | 966.1 | 18.6 | 0.27 | 3870 | 4100 | 6300 | 20.1 | NE | 0.83 | 1.57 |
| G93/Raunthi | RGI60-15.06564 | 12.5 | 10624.1 | 11.79 | 8691.2 | 1932.9 | 37.2 | 0.67 | 4000 | 4480 | 6000 | 19.0 | NW | 2.63 | 3.56 |
| G94 | RGI60-15.07091 | 1.9 | 2830.1 | 1.75 | 2741.7 | 88.5 | 1.7 | 0.11 | 4640 | 4730 | 6700 | 39.0 | W | 0.04 | 0.31 |
| G95 | RGI60-15.06591 | 2.3 | 5850.3 | 1.57 | 4019.5 | 1830.8 | 35.2 | 0.76 | 3690 | 4070 | 5900 | 24.7 | NW | 0.12 | 0.42 |
| G96 | RGI60-15.06583 | 1.1 | 2031.1 | 1.08 | 1969.9 | 61.2 | 1.2 | 0.03 | 4830 | 4860 | 5350 | 26.1 | SE | 0.01 | 0.18 |
| G97 | RGI60-15.07087 | 1.7 | 4146.6 | 1.64 | 3997.1 | 149.5 | 2.9 | 0.06 | 4880 | 4900 | 6000 | 20.6 | E | 0.07 | 0.19 |
| G98 | RGI60-15.06579 | 4.6 | 5610.2 | 3.45 | 4355.2 | 1255.0 | 24.1 | 1.17 | 3990 | 4400 | 5600 | 19.7 | NW | 0.03 | 0.33 |

| Fragmented Glaciers | RGIId | Area (km2) 2020 | Length (m) 2020 | Min_Elevation in 2020 (m) | Max_Elevation (m) | MEAN SLOPE (°) | Aspect |
| --- | --- | --- | --- | --- | --- | --- | --- |
| G8/f1 | RGI60-15.06943 | 1.29 | 1877.48 | 5500 | 6200 | 38.1 | N |
| G13/f1 | RGI60-15.06895 | 1.78 | 3007.23 | 5600 | 4780 | 17.13 | NW |
| G13/f2 | RGI60-15.06898 | 1.54 | 2374.16 | 4890 | 5800 | 22.98 | NE |
| G13/f3 | RGI60-15.06899 | 1.51 | 2062.81 | 4860 | 5800 | 22.43 | SE |
| G18/f1 | RGI60-15.06893 | 1.80 | 2402.27 | 5490 | 5900 | 15.36 | E |
| G19/f1 | RGI60-15.06889 | 3.25 | 3629.31 | 5350 | 6200 | 13.12 | NW |
| G28/f1 | RGI60-15.06854 | 1.28 | 2993.96 | 5500 | 5900 | 13.76 | SE |
| G30/f1 | RGI60-15.06852 | 1.03 | 1922.57 | 5450 | 5700 | 11.85 | NE |
| G34/f1 | RGI60-15.06987 | 8.55 | 9053.59 | 4800 | 6650 | 17.53 | SW |
| G36/f1 | RGI60-15.06834 | 1.59 | 2635.39 | 5420 | 6100 | 18.03 | SE |
| G37/f1 | RGI60-15.06828 | 2.84 | 4814.97 | 4960 | 5500 | 10.43 | SE |
| G40/f1 | RGI60-15.06800 | 1.37 | 2520.42 | 4410 | 5600 | 29.29 | SW |
| G45/f1 | RGI60-15.06807 | 3.88 | 4215.80 | 4050 | 5200 | 19.58 | SE |
| G45/f2 | RGI60-15.06808 | 1.20 | 2010.41 | 4600 | 6100 | 19.51 | NE |
| G52/f1 | RGI60-15.06978 | 3.55 | 4513.65 | 4950 | 5550 | 14.56 | SE |
| G55/1 | RGI60-15.06815 | 1.82 | 2390.87 | 5390 | 5850 | 20.77 | NE |
| G76/f1 | RGI60-15.07022 | 1.12 | 1897.32 | 5090 | 6200 | 15.54 | SE |
| G80/f1 | RGI60-15.06766 | 1.77 | 3275.53 | 4550 | 5400 | 23 | SE |
